# Supplementary material for: Effective detection and cell imaging of prion protein with new prepared targetable yellow-emission silver nanoclusters
Source: Royal Society of Chemistry journal article supplement (doi:10.1039/c2an36456e), 2012-11-19

*Supporting information*

**Effective detection and cell imaging of prion protein with  
new prepared targetable yellow-emission silver nanoclusters**

Ya Wen Zhou <sup>a</sup>, Chun Mei Li <sup>a</sup>, Yue Liu <sup>a</sup>, Cheng Zhi Huang <sup>b,\*</sup>

<sup>a</sup> *Education Ministry Key Laboratory on Luminescence and Real-Time Analysis,*

*College of Chemistry and Chemical Engineering,* <sup>b</sup> *College of Pharmaceutical*

*Sciences, Southwest University, Chongqing 400715, PR China*

Tel: +86-23-68254659

E-mail address: chengzhi@swu.edu.cn.

**Fig. S1**

Fluorescence intensity changes of Apt-AgNCs in cell culture medium within 3 hours. The excitation was 490 nm, and emission was recorded at 565 nm. All data were collected from three measurements, and the error bars indicate the standard deviation.

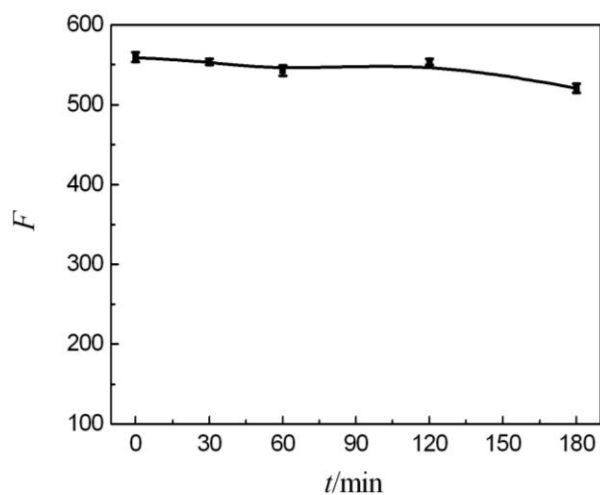

**Fig. S2**

Cell growth inhibition assay of Apt-AgNCs to SK-N-SH cells after 24 h incubation. All data were collected from three measurements, and the error bars indicate the standard deviation.

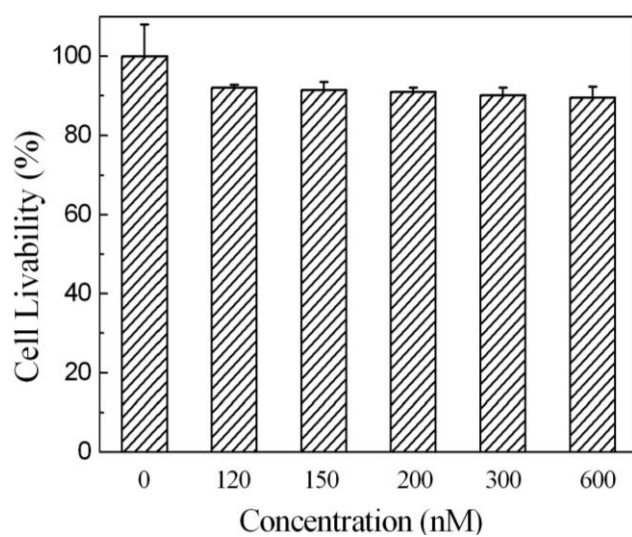

**Fig. S3**

Fluorescence emission spectra of AgNCs templated with the control sequence in the presence (red) and absence (black) of PrP<sup>C</sup>. The excitation was 490 nm, concentrations: AgNCs, 1  $\mu$ M; PrP<sup>C</sup>, 106 nM; pH 6.6

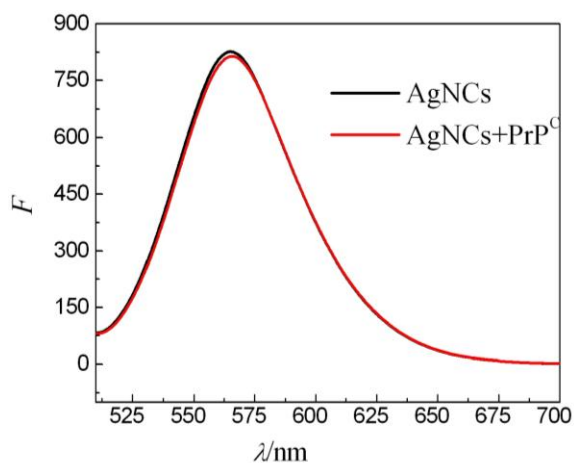

**Fig. S4**

UV-Vis spectra of Apt-AgNCs before (black) and after (red) the addition of PrP<sup>C</sup>. Concentrations: Apt-AgNCs, 1  $\mu$ M; PrP<sup>C</sup>, 106 nM; pH 6.6.

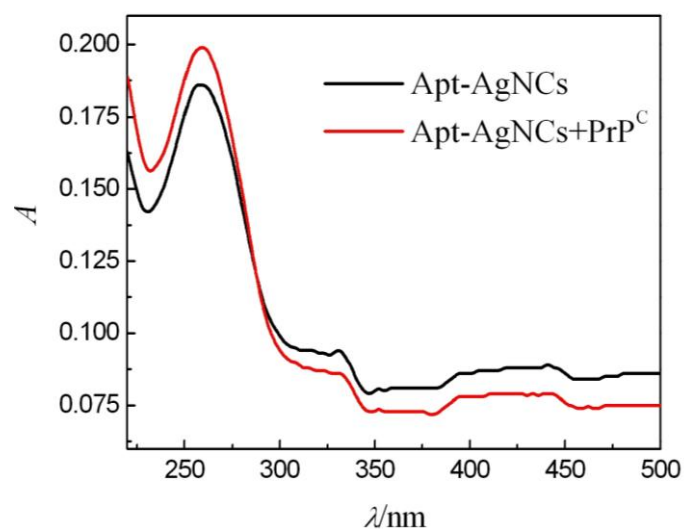

**Fig. S5**

The fluorescence decay curves of Apt-AgNCs before (black) and after (red) the addition of PrP<sup>C</sup>. Concentrations: Apt-AgNCs, 1  $\mu$ M; PrP<sup>C</sup>, 106 nM; pH 6.6.

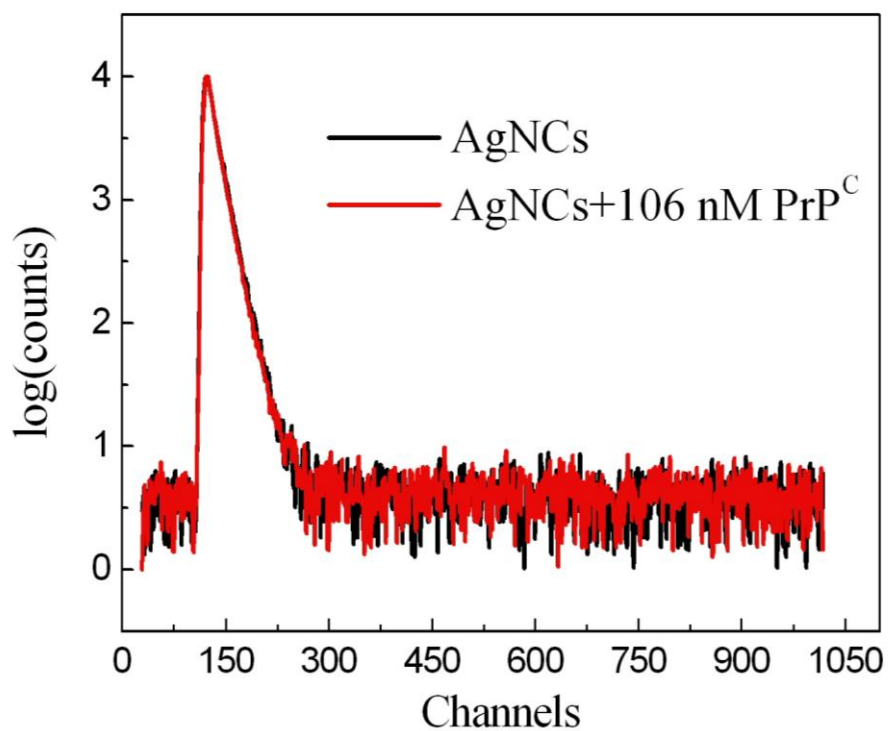

Supplement: c2an36456e.pdf [file c2an36456e.pdf]
